1 **Title:** Wetland birds in the northern prairie pothole region may show sensitivity to agriculture.

2 **Authors:** Jody Daniel, Heather Polan and Rebecca C Rooney\*

3 **\*Corresponding Author:** B2-251 200 University Avenue West, Waterloo, ON, N2L3G1;

4 [j9daniel@uwaterloo.ca](mailto:j9daniel@uwaterloo.ca)

5 **Author Affiliations and Email Addresses:**

6 Jody Daniel: University of Waterloo, Department of Biology. [j9daniel@uwaterloo.ca](mailto:j9daniel@uwaterloo.ca) .ORCID:

7 0000-0003-3153-8164

8 Heather Polan: University of Waterloo, Department of Biology. [hmpolan@gmail.com](mailto:hmpolan@gmail.com)

9 Rebecca C Rooney: University of Waterloo, Department of Biology.

10 [rebecca.rooney@uwaterloo.ca](mailto:rebecca.rooney@uwaterloo.ca). ORCID: 0000-0002-3956-7210

11 **Abstract:**

12 Wetland losses in the Northern Prairie Pothole Region (NPPR) are largely attributed to  
13 agriculture. Since land-use is known to influence bird habitat selection, bird community  
14 composition is likely sensitive to the extent of neighboring agricultural activity. We determined  
15 which local and landscape habitat variables are most predictive of wetland bird assemblage  
16 occurrence in southern Alberta. We: 1) identified distinct bird assemblages with a cluster  
17 analysis, 2) identified which species were indicative of these assemblages using an indicator  
18 species analysis and 3) predicted which bird assemblage would occur in a wetland with a  
19 classification and regression tree. Avian assemblages were more loosely defined and had few  
20 indicator species. Importantly, assemblages were specific to the natural region in which the  
21 wetland occurred. Also, landscapes with higher agricultural activity generally supported  
22 waterfowl and shorebirds, likely because agricultural activities excluded wetland-dependent  
23 birds that nest in upland habitat. Though waterfowl and shorebirds show poor sensitivity to

24 surrounding landscape composition, edge-nesting wetland avifauna may make good indicators of  
25 ecological integrity.

## 26 **Introduction**

27 The majority of wetland losses in the Northern Prairie and Parkland Region (NPPR) are  
28 attributed to agricultural and urban development (Kennedy and Mayer 2002; Mitsch and  
29 Gosselink 2015), with agriculture leading to losses of about 90% of historic wetlands by 1951 in  
30 the Canadian NPPR (Bethke and Nudds 1995). Wetlands lost to agriculture are usually filled or  
31 drained to protect neighboring croplands from flooding and to increase cropland area (Schindler  
32 and Donahue 2006; Verhoeven and Setter 2010). The remaining wetlands undergo physical and  
33 chemical alterations (Rashford et al. 2011), which include 1) increased sedimentation due to  
34 tillage (Zedler and Kercher 2005) and livestock grazing (Bloom et al. 2013); 2) higher nutrient  
35 loading from fertilizer use (Schindler and Donahue 2006); 3) slower recovery rates when  
36 exposed to disturbance (Bartzen et al. 2010); and 4) lengthened hydroperiods as soil infiltration  
37 rates are lowered (van Der Kamp et al. 1999) and runoff is consolidated (McCauley et al. 2015).  
38 Thus, wetlands that have escaped drainage or infilling may still be degraded by agricultural  
39 activity in the surrounding landscape.

40 Even with conservation policies to protect wetlands, we continue to witness wetland loss  
41 and degradation (Clare and Creed 2014; Davidson 2014). In the United States, for example, there  
42 are no federal policies that manage farming practices around wetlands (Johnston 2014; Mitsch  
43 and Gosselink 2015), though farmers require permits for activities that occur within a wetland  
44 under Section 404 of the Clean Water Act (U.S. EPA 2017). Similarly, the Albertan wetland  
45 policy (Government of Alberta 2013) offers legal protection to wetlands and introduces  
46 innovation in shifting the focus of management from an area-basis to a function-basis. The

47    Albertan wetland policy fails to, however, provide protective buffers around wetlands  
48    (Government of Alberta 2013). Consequently, despite legal protections and regulation of  
49    activities that occur within wetland boundaries, wetland integrity and function may be  
50    compromised by adjacent human activities through connections linking wetlands to their  
51    catchments and beyond (Jones et al 2018; Kraft et al 2019).

52            Compromised wetland integrity may endanger bird populations because they are sensitive  
53    to both changes in wetland condition and landscape structure. For example, Mensing et al.  
54    (1998) found that, out of six taxa surveyed, birds were the best indicator of landscape condition  
55    surrounding small-stream riparian wetlands. Bird diversity and richness were highly correlated  
56    with the extent of cultivated land, wetland and forest cover within 500 and 1000 metre (m) radii  
57    (Mensing et al. 1998). These findings are echoed in research in Alberta’s Parkland region, which  
58    concluded that bird community integrity in shallow open-water wetlands was sensitive to road  
59    density, forest cover, and the amount of other wetland habitat within 500 m (Rooney et al. 2012).

60            Most research on the drivers of bird composition in wetlands have focused on  
61    permanently-ponded wetlands. Yet, temporarily- to semi-permanently-ponded wetlands also  
62    comprise high-value bird habitat, especially for breeding and brood-rearing birds (Burger 1985;  
63    Hands et al. 1991). Small, isolated wetlands sustain metapopulations (Semlitsch and Bodie  
64    1998), and they are invaluable habitat for terrestrial, facultative, and obligate birds because 1)  
65    there are lower occurrences of mammalian predators (Burger 1985); 2) there are interspersions of  
66    mudflats that allow birds to dabble (Osborn et al. 2017), which allows them to feed while  
67    remaining alert for predators (Pöysä 1986); 3) macroinvertebrate prey are abundant and diverse  
68    (Zimmer et al. 2000; Gleason and Rooney 2017); and 4) the absence of fish improves food  
69    availability for birds (Zimmer et al. 2001). For example, Shealer and Alexander (2013) reported

70 that insectivorous Black Terns (*Chlidonias niger*), which nest in more-permanently flooded  
71 wetlands, commonly forage in temporarily-flooded wetlands up to 4 kilometres (km) away.  
72 Since wetlands that dry up during the breeding season provide additional foraging opportunities  
73 for birds and refuge from predators, they are valuable bird habitat.

74         Since land-use is known to influence bird habitat selection (Ballard et al. 2014), we  
75 anticipate that bird community composition and guild structure in prairie pothole wetlands will  
76 be sensitive to the extent of agricultural activity in adjacent lands. We seek to determine which  
77 local- and landscape-level habitat variables are most predictive of bird assemblage occurrence in  
78 prairie potholes of Alberta. If birds are sensitive to agricultural activity in the surrounding  
79 landscape, it raises concerns that existing wetland policy that fails to provide buffer protections  
80 surrounding wetlands, may fail to protect bird communities and the important ecological services  
81 they provide. Furthermore, we evaluate the dependency of these predictions on wetland-  
82 dependent birds, including shorebirds, wetland-dependent songbirds and waterfowl. We asked 1)  
83 if there are distinct assemblages of birds occupying these wetlands, 2) if so, what habitat traits at  
84 the local- and landscape-level are predictive of assemblage occurrence; and 3) whether bird  
85 assemblages could be used to indicate the level of agricultural disturbance affecting a prairie  
86 pothole wetland.

## 87 **Methods**

### 88 *Study Area*

89         Our study region encompasses the Parkland and Grassland natural regions of Alberta  
90 (Fig. 1). In this semi-arid climate, evapotranspiration rates exceed annual precipitation (Downing  
91 and Pettapiece 2006; Millett et al. 2009), but depressions created by glaciation nonetheless give  
92 rise to a high density of small wetlands known as prairie potholes. The Parkland is cooler and

93 moister, supporting a mosaic of deciduous forest and grassland. The Grassland is warmer and too  
94 dry for most trees (Downing and Pettapiece 2006).

### 95 ***Study Design***

96 We selected 72 natural wetlands than ranged in permanence class from temporarily-  
97 ponded to permanently-ponded (*sensu* Stewart and Kantrud 1971) and were evenly distributed  
98 among six, randomly selected sub-watersheds (three in each Natural Region – Grasslands and  
99 Parklands) of glaciolacustrine or glaciofluvial-derived surficial geology (Fig. 1). Our selected  
100 wetlands reflected the frequency distribution of wetland sizes within each sub-watershed, based  
101 on the Alberta Merged Wetland Inventory (Government of Alberta 2014a), and so were  
102 generally small (mean size  $0.66 \pm \text{SE } 0.07$  ha). To guard against spatial dependencies, sites were  
103 spaced a minimum of 3.5 km apart. Independent of their hydroperiod, wetlands were selected to  
104 span a gradient in the extent of agricultural activity in the surrounding landscape (i.e., the  
105 percentage cropping, haying, and pastureland covers within 500 m buffers around each wetland's  
106 perimeter). Land cover data were derived from the Agriculture and Agri-Food Canada Annual  
107 Crop Inventory Data (AAFC 2015) and supplemented with information from the provincial  
108 Grassland Vegetation Inventory (Government of Alberta 2014b). We used a 500 m buffer  
109 because this scale has been reported as the most influential of bird community integrity in  
110 permanently-ponded wetlands in Alberta's Parkland (Rooney et al. 2012). Due to the level of  
111 agricultural activity in the Grassland natural region (Downing and Pettapiece 2006), where over  
112 70% of land is privately owned (AEP 2011), truly pristine reference sites are scarce.  
113 Consequently, we classified wetlands with less than 25% agricultural land cover as being in the  
114 least disturbed condition (*sensu* Stoddard et al. 2006) and used these as a reference condition

115 against which medium (25-75% agricultural cover) and high disturbance (greater than 75%  
116 agricultural cover) wetlands could be compared.

### 117 *Bird Surveys*

118 Bird surveys were conducted by pairs of observers in 2014 and 2015, following the  
119 method described in Wilson and Bayley (2012). In brief, surveys comprised a 10-min visual  
120 survey followed by an 8-minute acoustic fixed-radius point count survey, with a radius of 100 m.  
121 Because most wetlands were less than 1 ha, a single 100-m radius point count covered the entire  
122 wetland. Larger sites were surveyed from two-point count locations, providing they could be  
123 positioned at a minimum of 200 m apart, in which case counts were summed to reflect the  
124 wetland as the sample unit.

125 Surveys were conducted twice at each wetland during the breeding season (May 19<sup>th</sup> –  
126 June 24<sup>th</sup>) to account for any temporal partitioning of breeding activity among species within the  
127 general breeding season. Consequently, we summed counts across surveys. Generally, birds in  
128 our study region sing and call between sunrise and 11:00 am (Farr et al. 2012). Thus, all surveys  
129 were restricted to this time period.

130 All birds visually observed foraging or nesting or heard singing or calling at the site were  
131 enumerated and identified to species. Bird identifications followed the American Ornithologists  
132 Union Standard Information used to determine guild membership of bird species, such as feeding  
133 traits, preferred habitat, and migration patterns, were retrieved from Birds of North America  
134 Online (CLO 2014). We distinguish between this complete bird assemblage and the subset of  
135 birds observed using the marsh that are classified as wetland-dependent species (Online  
136 Resource 1); only these wetland-dependent species were included in our subsequent analyses.

137 ***Local-level Habitat Characterization***

138           We surveyed the vegetation at each wetland during peak aboveground biomass between  
139 late July and August. First, we used a sub-meter accuracy GPS (Juno Trimble T41; SXBlue II  
140 GPS/GNSS Receiver) to delineate the wetland boundary such that the perimeter of the wetland  
141 lay where vegetation transitioned to <50% cover by wetland-obligate plant species. Next, we  
142 sub-divided the wetland into zones based on vegetation form (woody vegetation, drawdown,  
143 ground cover, narrow-leaved emergent, broad-leaved emergent, robust emergent, open-water  
144 area) and the associated dominant or co-dominant macrophyte species. These vegetation zones  
145 were delineated in the same manner as the wetland and their area calculated in the field to inform  
146 quadrat-based sampling intensity. Each vegetation zone was then characterized by a minimum of  
147 five 1 m<sup>2</sup> quadrats. If a zone was larger than 5000 m<sup>2</sup>, we added one quadrat per 1000 m<sup>2</sup>.  
148 Finally, we estimated the mean percent cover among plots and then relativized our estimates to  
149 100%, for a site-level estimate of vegetation cover.

150           In addition to vegetation surveys, we monitored abiotic variables known to influence  
151 bird habitat selection. From May and September 2014, we measured water depth using staff  
152 gauges, providing ponded water remained in the wetland. This was used to calculate the  
153 wetland's maximum water, minimum water depth, and seasonal amplitude (maximum depth  
154 minus minimum depth).

155 ***Statistical Analysis***

156           Our analysis objectives were 1) to test whether the birds grouped into distinct  
157 assemblages; and 2) to determine which local- and landscape-level variables were most  
158 predictive of bird assemblage occurrence by developing a model to classify wetlands in terms of

159 their expected bird assemblage based on local- and landscape-variables, with particular emphasis  
160 on the level of agricultural activity surrounding each wetland.

161 We used a square-root transformation and relativized our wetland-dependent bird count  
162 data by the maximum value in each column to improve multivariate normality and reduce the  
163 influence of numerically-dominant species. To reduce data sparsity, we removed rare avian  
164 species (<2 occurrences out of 72 wetlands). Following the recommendations of McCune and  
165 Grace (2002), we used a Bray-Curtis dissimilarity measure to characterize distances in species  
166 space of community composition among our wetlands.

### 167 *Cluster & Indicator Species Analysis*

168 We used a cluster analysis to identify distinct wetland-dependent bird assemblages  
169 among our sites. We used a hierarchical agglomerative polythetic process for the cluster analysis  
170 using the cluster package (Maechler et al. 2018) in R statistical software (R Core Team 2017).  
171 For the cluster analysis, we specified a flexible beta linkage method (beta = -0.250) and used the  
172 Bray-Curtis distance measure, based on the recommendations of McCune and Grace. (2002).  
173 Also using the cluster package, we then pruned the dendrogram iteratively, varying the number  
174 of groups among sites from two to 20.

175 We used an indicator species analysis (ISA) to determine the optimal number of wetland-  
176 dependent bird assemblages among our sites as the number of groups generating the smallest  
177 average  $p$ -value across indicator species. As described in Dufrêne and Legendre (1997), this  
178 analysis estimates the indicator value of each species based on their relative abundance and  
179 frequency in each group and assigns a measure of statistical significance using a Monte Carlo  
180 method with 4999 permutations. For the ISA, we used the labdsv package in R (Roberts 2016),  
181 and the site-group memberships (overall number of assemblages among our sites) derived from



182 the trimmed dendrogram. In ISAs, because groups with one sample unit must be excluded from  
183 analysis (Peck 2010), we limited our analysis to site-group memberships with at least two sites  
184 per group.

### 185 *Visualizing Community Composition*

186 To visualize how wetland-dependent bird communities are related to the local and  
187 landscape variables, we ran nonmetric multidimensional scaling ordinations (NMDSs) on our  
188 two bird matrices. We used the NMDSs to visualize how 1) the local and landscape variables in  
189 the final classification and regression tree (CART) model (described below) were related to  
190 community composition, and 2) functional traits were related to each wetland-dependent bird  
191 assemblage identified in the ISA. We used the vegan package to implement the NMDSs  
192 (Oksanen et al. 2017) in R statistical software (R Core Team 2017).

193 After implementing each NMDS, we used vector overlays to visualize how species  
194 counts ( $r^2 > 0.2$  with at least one axis) and counts of species possessing various functional traits  
195 aligned ( $r^2 > 0.1$  with at least one axis) with major trends in bird community composition. We  
196 symbolized sites by assemblages identified in the combined cluster analysis and ISA.

### 197 *Classification and Regression Tree*

198 Finally, we developed a classification and regression tree to predict which wetland-  
199 dependent bird assemblage would occur at a marsh, using a combination of local- and landscape-  
200 level data. In our case, the classification and regression tree partitions the wetlands based on  
201 local- and landscape-level characteristics to create nodes of wetlands such that the deviance  
202 between node membership and bird assemblage cluster is minimized. We used local-level (size,  
203 percentage cover of woody, robust emergent and broad leaf plants, maximum water depth) and  
204 landscape-level variables (percentage cover of grassland, forest and shrubs, water and wetlands,

205 cropland and human-related land use within a 500 m radius) that would be critical in influencing  
206 the functional traits of wetland-dependent birds present in a wetland, as predictors in the  
207 classification tree.

208 We used the “tree” package (Ripley 2016) in R statistical software (R Core Team 2017),  
209 to implement the classification and regression tree. The classification tree implements binary  
210 recursive partitioning, using the deviance index described in Breiman et al. (1984) to estimate  
211 impurity for splitting, and stops splitting when the terminal node passes a size threshold for the  
212 number of wetlands included (Ripley 2016). Next, we used k-fold cross-validation to prune the  
213 tree, where  $k = 10$ , which was based on cost-complexity as measured by deviance. We also used  
214 the “tree” package to determine the number of misclassifications for the overall tree, as well as  
215 the number of misclassifications at each node. Because our small sample size could contribute to  
216 unstable k-fold cross-validation errors with increasing tree size, we repeated the test 100 times  
217 and found the mean and standard error across iterations.

218 We used goodness of fit tests to measure if our classification and regression tree  
219 predictions differed from the groups generated by the combined cluster analysis and ISA. Using  
220 the DescTools package (Signorell 2017) in R, and a Williams correction for our small sample  
221 size, we performed a G-Test. Next, we used the caret package (Kuhn 2017) in R to examine  
222 whether there was strong agreement between our classification and regression tree predictions  
223 and ISA assemblages, using kappa statistics.

## 224 **Results**

### 225 *Cluster & Indicator Species Analysis*

226 We differentiated five distinct wetland-dependent bird assemblages (dendrogram in Fig. 2;  
227 indicator values listed in Table 1), using agglomerative hierarchical clustering and ISA. We

228 assigned each assemblage a name reflecting the life history traits of the birds that were the  
229 strongest indicators of the assemblage (indicator values listed in Table 1). Only a few species  
230 were considered significant indicators of the five wetland-dependent bird assemblages. Note that  
231 all but one wetland-dependent bird assemblage had at least one significant indicator species that  
232 was both faithful and relatively exclusive to that assemblage of birds. The exception is the  
233 Hummock Nesters (Table 1), which was the first assemblage to merge with another (Pond and  
234 Reed Associates) at a Bray-Curtis dissimilarity value of about 0.8 during cluster analysis. The  
235 strongest indicator species for the Hummock Nesters was Wilson's Snipe (*Gallinago delicata*),  
236 with an indicator value of 25.35 ( $p = 0.100$ ). A list of indicator values of all bird species included  
237 in the cluster and indicator species analyses is presented in Table 1.

### 238 ***Visualizing Community Composition***

239         Based on an assessment of the marginal decline in stress with increasing dimensionality,  
240 we concluded that a three-dimensional solution was optimal for both our NMDS ordinations. The  
241 NMDS, final stress was 18.58, and the NMDS converged in fewer than 20 runs.

242         The abundance of wetland-dependent birds differed among assemblages, based on their  
243 nesting or habitat preferences (Fig. 3). Unsurprisingly, the Shrub Associates assemblage  
244 supported shrub species [e.g. Gray Catbird (*Dumetella carolinensis*)]. However, both shorebird  
245 [e.g. Willet] and non-shorebird species [e.g. Mallards (*Anas platyrhynchos*)] were associated  
246 with the Wetland Edge Nester assemblage (Fig. 3C; 3D). Wetlands classified as supporting the  
247 Shorebird Assemblage contained abundant shorebird and ground nesting species (Fig. 3A; 3B).  
248 The Hummock Nester-classified wetlands shared species with all assemblages except the shrub  
249 associates (Fig. 3A; 3B), and they were not strongly associated with any bird nesting or habitat

250 preferences (Fig. 3C; 3D). Conversely, only marsh (e.g. Sora) or pond species (e.g. American  
251 Coot) were associated with the Pond and Reed Nesters assemblage (Fig. 3A; 3C).

252 The NMDS axes were indicative of various local- and landscape-scale wetland  
253 characteristics. Axis one in the NMDS reflected a disturbance gradient (Fig. 3C; 3D), wetlands  
254 differed in which Natural Region they were located along axis two (Fig. 3C) and axis three  
255 reflected a hydroperiod gradient (Fig. 3D).

## 256 *Classification and Regression Tree*

### 257 *All Birds*

258 Using a combination of local and landscape-level variables (comprehensive list of  
259 variables in Online Resource 2), we predicted which of the bird assemblages would occur at a  
260 given wetland. The classification tree had ten terminal nodes (Fig. 4), with low total residual  
261 deviance (12.48) and a misclassification error rate of 27%. Based on 10-fold cross validation  
262 error, we trimmed the tree from ten (cross-validation error = 60%) to eight (cross-validation error  
263 = 59%) terminal nodes (Table in Online Resource 3). The pruned tree had a marginally higher  
264 total residual deviance (12.94), but the same misclassification error rate (27%).

265 The pruned model predicted all five assemblages. The model predictions had strong  
266 agreement with the assemblages from the ISA ( $\kappa = 66\%$ ). More, any differences between the  
267 classification tree predictions and the observed assemblages were not statistically significant (G-  
268 Test:  $G = 10.19$ ,  $df = 63$ ,  $p\text{-value} = 1.00$ ).

269 The Wetland Edge Nesters and Shorebirds assemblages were the most distinct (in local  
270 and landscape characteristics), occurring in a single terminal node (Fig. 4). The other  
271 assemblages each occurred in two terminal nodes but differed in the distances between nodes  
272 (Fig. 4). The Shorebirds assemblage was the third-most distinct assemblage, though predicted at

273 different tree heights. The Pond and Reed Nesters had the furthest vertical distance between the  
274 nodes. However, the Hummock Nester-classified wetlands were predicted in both regions,  
275 suggesting they were the least distinct assemblage.

276 Misclassification error rates were moderate (0 – 46%) (Table 2). Error rates were highest  
277 for adjacent assemblages (e.g. Wetland Edge Nesters vs. Hummock Nesters), supporting birds  
278 with similar foraging and nesting preferences. Conversely, error rates were low for assemblages  
279 that were restricted to a region (e.g. Shorebirds vs Pond and Reed Nesters) (Fig. 4; Table 2).

280 Local wetland characteristics were most predictive of assemblages (Fig. 4). Similar to our  
281 analysis on all birds using a wetland, Natural Region was the strongest predictor of assemblages.  
282 Apart from Hummock Nesters and Wetland Edge Nesters, the assemblages were predicted by  
283 proxies for wetland hydroperiod (e.g., size, depth) and vegetation characteristics (e.g., robust  
284 emergent vegetation cover, broadleaf vegetation cover).

## 285 **Discussion**

286 Although wetland policy across North America aims to protect wetlands, neither  
287 American nor Canadian policy limits what activities can take place in the immediate landscape  
288 surrounding wetlands. If wetland bird communities are sensitive to adjacent land cover/land use,  
289 then existing policy may be incapable of conserving wetland functions without incorporating  
290 some buffer protections. Conversely, if avifauna are sensitive only to in situ wetland conditions  
291 such as hydrology and vegetation structure, then buffer protections should not be necessary to  
292 conserve bird community function and integrity. Based on prior research (e.g., Rooney et al  
293 2012; Anderson and Rooney 2019), we predicted that bird community composition and guild  
294 structure in wetlands of the Grassland and Parkland Natural Regions of Alberta would be  
295 sensitive to the proportion of agricultural land cover in the surrounding landscape. We found

296 some support for this prediction – one of our five wetland-dependent bird assemblages were  
297 absent from wetlands in agriculturally-dominated landscapes. We attribute this to differences in  
298 the nesting behaviors of this assemblage – they nested in upland habitat and consequently  
299 selected for landscapes with more natural land cover, mainly grassland. Conversely, dabblers,  
300 divers, and waders were indicative of assemblages in landscapes with more agricultural activity  
301 and longer hydroperiods. Consequently, waterfowl and shorebirds are less sensitive to this land  
302 conversion, and so come to dominate wetlands situated in agricultural landscapes. However, the  
303 importance of surrounding land cover in predicting which wetland-dependent assemblage would  
304 occur at a wetland was less evident than we anticipated.

305         The most significant predictor of bird assemblage occurrence was the Natural Region that  
306 the wetland fell in – Parkland vs. Grassland. The Grassland and Parkland natural regions differ in  
307 both their landscape- and local-level characteristics. At the landscape-level, the Parkland  
308 supports copses of aspen forest and more shrubland than the Grassland (Downing and Pettapiece  
309 2006). Further, while there is more cropland in the Parkland, pastureland and haying are more  
310 common in the Grassland (Downing and Pettapiece 2006). Also, because of differences in  
311 climate, we observe a higher abundance of wetlands with longer hydroperiods in the Parkland  
312 (Government of Alberta 2014a). In the more arid Grassland, the magnitude of difference  
313 between potential evapotranspiration and precipitation is larger, resulting in the dominance of  
314 shorter-hydroperiod wetlands (e.g., temporary and seasonal). Thus, we likely find Natural  
315 Region to be a strong predictor of avian assemblage occurrence because of the preference of  
316 some bird species for shorter-hydroperiod wetlands in mixed-grass prairie typical of the  
317 Grassland (e.g., Shorebirds) versus the preference of other bird species for longer-hydroperiod

318 wetlands in landscapes with more shrubland and forest typical of the Parkland (e.g., Pond/Reed  
319 Associates).

320         The composition of the landscape surrounding a wetland is not strongly predictive of  
321 which wetland-dependent assemblage we find occupying a wetland. Local-level factors such as  
322 hydroperiod (wetland permanence class, depth and size) and vegetation characteristics  
323 (percentage cover of broadleaf and robust emergent plants) were important predictors of  
324 assemblage occurrence. An explanation for this influence of local-level factors is that both  
325 wetland hydroperiod and vegetation dictate food availability (Lantz et al. 2011) and nesting  
326 opportunities for wetland-dependent birds (Kantrud and Stewart 1984). Because many wetland-  
327 dependent birds have feeding behaviors (e.g., diving, dabbling, and wading) tied to the  
328 availability of open water habitat, these local-level factors were critical in determining whether  
329 their habitat needs could be met. For instance, the Pond and Reed Associate and the Shorebird  
330 assemblages were distinguished using both the all birds and wetland-dependent bird datasets.  
331 These assemblages were characterized by birds that dive, dabble, and wade to feed. More, these  
332 assemblages were predicted to occur in wetlands that were deeper, larger, and had longer  
333 hydroperiods and nearly all their indicator species were ground, pond or reed nesters that nest in  
334 the wetland proper. Thus, we conclude that these assemblages were most sensitive to in situ  
335 factors about the wetland, rather than the character of its surrounding landscape.

336         Waterfowl and shorebirds may dominate wetlands in landscapes heavily influenced by  
337 agriculture not necessarily because they profit from cropping and grazing activities, but because  
338 species reliant on upland habitat for nesting are excluded. Both the Wetland Edge Nesters and  
339 Hummock Nesters assemblages were predicted to occur in deeper ( $>0.53$  m), larger ( $>10745$  m<sup>2</sup>)  
340 wetlands in the Grassland, but it was the Hummock Nester assemblage that occurred in wetlands

341 with higher cropland activity in the surrounding landscape (>42 %). Consequently, species  
342 belonging to the Hummock Nester assemblage come to dominate these wetlands because their  
343 nesting habitat is still available when upland habitat is lost to agriculture, while wetland birds  
344 that typically nest in upland habitat are now unable to do so (e.g., species the Wetland Edge  
345 Nester assemblage). Similarly, Anderson and Rooney (2019) reported that significant differences  
346 in bird community composition between natural and restored wetlands in the Parkland region of  
347 Alberta were only evident when all birds were considered. They also reported that any difference  
348 in the composition of wetland-dependent birds were negligible because restored wetlands were  
349 similar to natural wetlands in their size, hydroperiod, and vegetation zonation, but differed  
350 significantly in terms of landscape context. Therefore, by using a more comprehensive bird  
351 survey data, we can develop bird-based wetland monitoring and assessment tools that reflect the  
352 community-wide impacts of land cover change on bird assemblage occurrence.

353 Our CART and NMDS can be useful tools in designing wetlands for wetland-dependent  
354 birds. Though the species pool did differ between Natural Regions, landscape composition can  
355 be important when designing wetlands for birds. For example, if a practitioner aimed to provide  
356 habitat for a Shorebird assemblage in the Grassland Natural Region, the wetland should be deep  
357 (> 0.53 m) or large (>10745 m<sup>2</sup>) (i.e., CART results) and have lower human activity (i.e., NMDS  
358 results). However, if the said practitioner was targeting Wetland Edge Nesters, the wetland can  
359 be smaller (<10745 m<sup>2</sup>) but should have moderate to low cropping activity in the landscape  
360 (<42.9 %).

### 361 ***Conclusion***

362 We show that, generally, wetland-dependent assemblages show poor sensitivity to  
363 agricultural activity. While waterfowl and shorebirds were sensitive to in situ properties of the



364 wetland, such as water depth and wetland size or vegetation zonation patterns, edge-nesting birds  
365 were excluded from wetlands with higher cropping activity. Waterfowl and shorebirds seem to  
366 dominate wetlands in landscapes with more agricultural activity because other avian species are  
367 excluded, despite being at greater risk of predation in these landscapes (Emery et al. 2005).  
368 SWhen designing wetlands for use by these wetland avifauna, our concurrent analyses using a  
369 CART and NMDS are useful tools in determining the landscape context and wetland  
370 characteristics suitable for assemblages that may be the target in restoration policy.

### 371 **Acknowledgements**

372 Funding for this research was provided by Alberta Innovates grant #2094A. We are  
373 grateful to Dr. Derek Robinson who assisted with site selection and land cover analysis. We are  
374 also grateful to Drs. Stephen Murphy and Roland Hall who provided feedback on an early draft  
375 of this manuscript. We thank Daina Anderson, Brandon Baer, Matt Bolding, Graham Howell,  
376 Adam Kraft, Jennifer Gleason and Nicole Meyers for collecting the field data. Finally, we thank  
377 Dr. Erin Bayne for supplying the automated recording units, which were used to verify auditory  
378 surveys.

379 **References**

- 380 AAFC (2015) Annual Crop Inventory - 2009-2014. Government of Canada:  
381 <http://open.canada.ca/data/en/dataset/ba2645d5-4458-414d-b196-6303ac06c1c9>
- 382 AEP (2011) Green/White Area. Government of Alberta, Edmonton, Alberta:  
383 [https://geodiscover.alberta.ca/geoportal/catalog/search/resource/details.page?uuid=%7BDF](https://geodiscover.alberta.ca/geoportal/catalog/search/resource/details.page?uuid=%7BDF54991B-D9DB-494F-B2E0-0A8D711D9CAB%7D)  
384 [54991B-D9DB-494F-B2E0-0A8D711D9CAB%7D](https://geodiscover.alberta.ca/geoportal/catalog/search/resource/details.page?uuid=%7BDF54991B-D9DB-494F-B2E0-0A8D711D9CAB%7D)
- 385 Anderson DL, Rooney RC (2019) Differences exist in bird communities using restored and  
386 natural wetlands in the Parkland region, Alberta, Canada. *Restoration Ecology* 27:1495–  
387 1507. doi: 10.1111/rec.13015
- 388 Ballard T, Seager R, Smerdon JE, et al (2014) Hydroclimate variability and change in the prairie  
389 pothole region, the “Duck factory” of North America. *Earth Interactions* 18:1–28. doi:  
390 10.1175/EI-D-14-0004.1
- 391 Bartzan BA, Dufour KW, Clark RG, Dale Caswell F (2010) Trends in agricultural impact and  
392 recovery of wetlands in prairie Canada. *Ecological Applications* 20:525–538. doi:  
393 10.1890/08-1650.1
- 394 Bethke RW, Nudds TD (1995) Effects of climate change and land use on duck abundance in  
395 Canadian prairie-parklands. *Ecological Applications* 5:588–600. doi: 10.2307/1941969
- 396 Bloom PM, Howerter DW, Emery RB, Armstrong LM (2013) Relationships between grazing  
397 and waterfowl production in the Canadian prairies. *Journal of Wildlife Management*  
398 77:534–544. doi: 10.1002/jwmg.497
- 399 Breiman L, Friedman J, Stone CJ, Olshen RA (1984) *Classification and regression trees*. Taylor

- 400           & Francis, Belmont, CA
- 401   Burger J (1985) Habitat selection in temperate marsh-nesting birds. *Habitat Sel. Birds*
- 402   Clare S, Creed IF (2014) Tracking wetland loss to improve evidence-based wetland policy
- 403           learning and decision making. *Wetlands Ecology and Management* 22:235–245. doi:
- 404           10.1007/s11273-013-9326-2
- 405   Cornell Laboratory of Ornithology (2014) The Birds of North America Online.
- 406           <http://bna.birds.cornell.edu/bna/>.
- 407   Davidson NC (2014) How much wetland has the world lost? Long-term and recent trends in
- 408           global wetland area. *Marine and Freshwater Research* 65:934–941. doi: 10.1071/MF14173
- 409   Downing DJ, Pettapiece WW (2006) Natural Regions and Subregions of Alberta. Government of
- 410           Alberta, Edmonton, Alberta
- 411   Dufrière M, Legendre P (1997) Species assemblages and indicator species: The need for a
- 412           flexible asymmetrical approach. *Ecological Monographs* 67:345–366. doi:
- 413           10.2307/2963459
- 414   Emery RB, Howerter DW, Armstrong M, et al (2005) Seasonal variation in waterfowl nesting
- 415           success and its relation to cover management in the Canadian prairies. *Journal of Wildlife*
- 416           *Management* 69:1181–1193. doi: 10.2193/0022-541X(2005)069[1181:SVIWNS]2.0.CO;2
- 417   Farr D, Shank C, Moses R, et al (2012) Terrestrial field data collection protocols (abridged
- 418           version), Version 20. Alberta Biodiversity Monitoring Institute, Edmonton, Alberta
- 419   Gleason JE, Rooney RC (2018) Pond permanence is a key determinant of aquatic
- 420           macroinvertebrate community structure in wetlands. *Freshwater Biology* 63:264–277. doi:

- 421 10.1111/fwb.13057
- 422 Government of Alberta (2013) Alberta Wetland Policy. Government of Alberta, Environment  
423 and Sustainable Resource Development, Edmonton, Alberta
- 424 Government of Alberta (2014a) Alberta Merged Wetland Inventory.
- 425 Government of Alberta (2014b) Grassland Vegetation Inventory (GVI) □: a multi-species  
426 conservation strategy for species at risk in the grassland natural region of Alberta.  
427 Edmonton, Alberta
- 428 Hands HM, Ryan MR, Smith JW (1991) Migrant Shorebird Use of Marsh, Moist-soil, and  
429 Flooded Agricultural Habitats. *Wildlife Society Bulletin* 19:457–464. doi: 10.2307/3782158
- 430 Johnston CA (2014) Agricultural expansion: land use shell game in the U.S. Northern Plains.  
431 *Landscape Ecology* 29:81–95. doi: 10.1007/s10980-013-9947-0
- 432 Jones CN, McLaughlin DL, Henson K, et al (2018) From salamanders to greenhouse gases: does  
433 upland management affect wetland functions? *Frontiers in Ecology and the Environment*  
434 16:14–19. doi: 10.1002/fee.1744
- 435 Kantrud H a, Stewart RE (1984) Ecological distribution and crude density of breeding birds on  
436 prairie wetlands. *The Journal of Wildlife Management* 48:426. doi: 10.2307/3801174
- 437 Kennedy G, Mayer T (2002) Natural and constructed wetlands in Canada: an overview. *Water*  
438 *Quality Research Journal of Canada* 37:295–325. doi: 10.1111/j.1469-8137.2010.03543.x
- 439 Kraft AJ, Robinson DT, Evans IS, Rooney RC (2019) Concordance in wetland physicochemical  
440 conditions, vegetation, and surrounding land cover is robust to data extraction approach.  
441 *PLOS ONE* 14:e0216343. doi: 10.1371/journal.pone.0216343

- 442 Kuhn M (2017) caret: classification and regression training. CRAN, R Package Version 6.0-78:  
443 <https://cran.r-project.org/package=caret>
- 444 Lantz SM, Gawlik DE, Cook MI (2011) The effects of water depth and emergent vegetation on  
445 foraging success and habitat selection of wading birds in the Everglades. *Waterbirds*  
446 34:439–447. doi: 10.1675/063.034.0406
- 447 Maechler M, Rousseeuw P, Struyf A, et al (2015) Cluster: cluster analysis basics and extensions.  
448 CRAN, R Package Version 2.0.7: <https://cran.r-project.org/web/packages/cluster/index.html>
- 449 McCauley LA, Anteau MJ, van der Burg MP, Wiltermuth MT (2015) Land use and wetland  
450 drainage affect water levels and dynamics of remaining wetlands. *Ecosphere* 6:art92. doi:  
451 10.1890/ES14-00494.1
- 452 McCune B, Grace JB, Urban DL (2002) Analysis of ecological communities. MjM Software  
453 Design, Glenden Beach, Oregon
- 454 Mensing DM, Galatowitsch SM, Tester JR (1998) Anthropogenic effects on the biodiversity of  
455 riparian wetlands of a northern temperate landscape. *Journal of Environmental Management*  
456 53:349–377. doi: 10.1006/jema.1998.0215
- 457 Millett B, Johnson WC, Guntenspergen G (2009) Climate trends of the North American prairie  
458 pothole region 1906–2000. *Climatic Change* 93:243–267. doi: 10.1007/s10584-008-9543-5
- 459 Mitsch WJ, Gosselink JG (2015) *Wetlands*, 5th edn. Wiley, New York, NY
- 460 Oksanen J, Blanchet FG, Kindt R, et al (2017) vegan: community ecology package. R Package.  
461 Version 2.4-2 1: <http://cran.r-project.org/package=vegan>
- 462 Osborn JM, Hagy HM, Mcclanahan MD, et al (2017) Habitat selection and activities of dabbling

- 463 ducks during non-breeding periods. *Journal of Wildlife Management* 81:1482–1493. doi:  
464 10.1002/jwmg.21324
- 465 Peck J (2010) *Multivariate analysis for community ecologists: step-by-step using PC- ORD*.  
466 MjM Software Design, Gleneden Beach, Oregon
- 467 Pöysä H (1986) Species composition and size of dabbling duck (*Anas* spp.) feeding groups: are  
468 foraging interactions important determinants? *Ornis Scandinavica* 63:33–41.
- 469 R Core Team (2017) *R: A language and environment for statistical computing*. R Foundation for  
470 Statistical Computing, Vienna, Austria, R Version 3.2.3: <http://www.r-project.org/>
- 471 Rashford BS, Bastian CT, Cole JG (2011) Agricultural land-use change in prairie canada:  
472 implications for wetland and waterfowl habitat conservation. *Canadian Journal of*  
473 *Agricultural Economics* 59:185–205. doi: 10.1111/j.1744-7976.2010.01212.x
- 474 Ripley B (2016) *Tree: classification and regression trees*. CRAN, R Package Version 1.0-37:  
475 <https://cran.r-project.org/web/packages/tree/index.html>
- 476 Roberts DW (2016) *labdsv: ordination and multivariate analysis for ecology*. CRAN, R Package  
477 Version 1.8-0: <https://cran.r-project.org/package=labdsv>
- 478 Rooney RC, Bayley SE, Creed IF, Wilson MJ (2012) The accuracy of land cover-based wetland  
479 assessments is influenced by landscape extent. *Landscape Ecology* 27:1321–1335. doi:  
480 10.1007/s10980-012-9784-6
- 481 Schindler DW, Donahue WF (2006) An impending water crisis in Canada’s western prairie  
482 provinces. *Proceedings of the National Academy of Sciences* 103:7210–7216. doi:  
483 10.1073/pnas.0601568103

- 484 Semlitsch RD, Bodie JR (1998) Are Small, Isolated Wetlands Expendable? Conservation  
485 Biology 12:1129–1133. doi: 10.1046/j.1523-1739.1998.98166.x
- 486 Shealer DA, Alexander MJ (2013) Use of aerial imagery to assess habitat suitability and predict  
487 site occupancy for a declining wetland-dependent bird. Wetlands Ecology and Management  
488 21:289–296. doi: 10.1007/s11273-013-9300-z
- 489 Signorell A (2017) DescTools: tools for descriptive statistics. CRAN, R Package Version 0.99.2:  
490 <https://cran.r-project.org/package=DescTools> Stewart RE, Kantrud HA (1971)  
491 Classification of natural ponds and lakes in the glaciated prairie region. Washington, DC
- 492 Stoddard JL, Larsen DP, Hawkins CP, et al (2006) Setting expectations for the ecological  
493 condition of streams: The concept of reference condition. Ecological Applications 16:1267–  
494 1276. doi: 10.1890/1051-0761(2006)016[1267:SEFTEC]2.0.CO;2
- 495 U.S. EPA (2017) Section 404 and Swampbuster: Wetlands on Agricultural Lands.  
496 <https://www.epa.gov/cwa-404/section-404-and-swampbuster-wetlands-agricultural-lands>.  
497 Accessed 9 Sep 2017
- 498 Van Der Kamp G, Stolte WJ, Clark RG (1999) Drying out of small prairie wetlands after  
499 conversion of their catchments from cultivation to permanent brome grass. Hydrological  
500 Sciences Journal 44:387–397. doi: 10.1080/02626669909492234
- 501 Verhoeven JTA, Setter TL (2010) Agricultural use of wetlands: opportunities and limitations.  
502 Annals of Botany 105:155–163. doi: 10.1093/aob/mcp172
- 503 Wilson MJ, Bayley SE (2012) Use of single versus multiple biotic communities as indicators of  
504 biological integrity in northern prairie wetlands. Ecological Indicators 20:187–195. doi:

505 10.1016/j.ecolind.2012.02.009

506 Zedler JB, Kercher S (2005) Wetland resources: status, trends, ecosystem services, and

507 restorability. *Annual Review of Environment and Resources* 30:39–74. doi:

508 10.1146/annurev.energy.30.050504.144248

509 Zimmer KD, Hanson MA, Butler MG (2000) Factors influencing invertebrate communities in

510 prairie wetlands: a multivariate approach. *Canadian Journal of Fisheries and Aquatic*

511 *Sciences* 57:76–85. doi: 10.1139/f99-180

512 Zimmer KD, Hanson MA, Butler MG, Duffy WG (2001) Size distribution of aquatic

513 invertebrates in two prairie wetlands, with and without fish, with implications for

514 community production. *Freshwater Biology* 46:1373–1386. doi: 10.1046/j.1365-

515 2427.2001.00759.x



**Table 1** This table provides indicator values for species belonging to each of the five bird assemblages identified via cluster analysis of the dataset including only birds categorized as wetland-dependent species. Each species is grouped under the assemblage for which it had the highest indicator value, and the table includes all 38 species, regardless of whether it was a significant indicator of an assemblage. However, only 13 species were significant indicators ( $p < 0.05$ ), indicated by “\*”. The associated  $p$ -value indicates the probability that an indicator value that large could be obtained from the data by chance alone. Note that the Hummock Nester assemblage was the first assemblage to merge (into the Pond and Reed Associates assemblage) during agglomerative clustering analysis (Figure 2) and had no significant indicators.

| Group Name             | Common Name                   | Scientific Name                   | Indicator Value | $p$ -value |
|------------------------|-------------------------------|-----------------------------------|-----------------|------------|
| Shrub Associates       | Song Sparrow*                 | <i>Melospiza melodia</i>          | 74.89           | 0.001      |
|                        | Common Yellowthroat           | <i>Geothlypis trichas</i>         | 13.33           | 0.169      |
|                        | Gray Catbird                  | <i>Dumetella carolinensis</i>     | 10.41           | 0.200      |
|                        | Nelson's Sparrow              | <i>Ammodramus nelsoni</i>         | 7.28            | 0.499      |
|                        | Lesser Scaup                  | <i>Aythya affinis</i>             | 7.54            | 0.602      |
|                        | Long-billed Curlew            | <i>Numenius americanus</i>        | 3.85            | 0.880      |
| Wetland Edge Nesters   | Marbled Godwit*               | <i>Limosa fedoa</i>               | 37.89           | 0.001      |
|                        | Mallard*                      | <i>Anas platyrhynchos</i>         | 35.29           | 0.015      |
|                        | Brewer's Blackbird            | <i>Euphagus cyanocephalus</i>     | 17.40           | 0.094      |
|                        | Canada Goose                  | <i>Branta canadensis</i>          | 17.75           | 0.193      |
| Hummock Nesters        | Wilson's Snipe                | <i>Gallinago delicata</i>         | 25.35           | 0.100      |
|                        | Swamp Sparrow                 | <i>Melospiza georgiana</i>        | 11.76           | 0.308      |
|                        | Bonaparte's Gull              | <i>philadelphia</i>               | 9.62            | 0.337      |
|                        | Lesser Yellowlegs             | <i>Tringa flavipes</i>            | 2.44            | 0.980      |
| Shorebirds             | Willet*                       | <i>Tringa semipalmata</i>         | 53.45           | 0.001      |
|                        | Wilson's Phalarope*           | <i>Phalaropus tricolor</i>        | 74.88           | 0.001      |
|                        | Northern Shoveler*            | <i>Anas clypeata</i>              | 39.24           | 0.005      |
|                        | Blue-winged Teal*             | <i>Anas discors</i>               | 31.10           | 0.027      |
|                        | Northern Pintail*             | <i>Anas acuta</i>                 | 26.38           | 0.042      |
|                        | Gadwall*                      | <i>Anas strepera</i>              | 28.70           | 0.046      |
|                        | American Avocet               | <i>Recurvirostra americana</i>    | 19.23           | 0.062      |
|                        | Green-winged Teal             | <i>Anas crecca</i>                | 14.08           | 0.306      |
|                        | American Wigeon               | <i>Anas americana</i>             | 8.43            | 0.341      |
|                        | Northern Rough-winged Swallow | <i>Stelgidopteryx serripennis</i> | 4.36            | 0.606      |
|                        | Horned Grebe                  | <i>Podiceps auritus</i>           | 4.12            | 0.818      |
| Pond & Reed Associates | Red-winged Blackbird*         | <i>Agelaius phoeniceus</i>        | 30.66           | 0.001      |
|                        | Sora*                         | <i>Porzana carolina</i>           | 44.53           | 0.001      |
|                        | American Coot*                | <i>Fulica americana</i>           | 37.00           | 0.008      |
|                        | Redhead*                      | <i>Aythya americana</i>           | 29.02           | 0.013      |
|                        | Black Tern                    | <i>Chlidonias niger</i>           | 13.33           | 0.105      |
|                        | Ring-billed Gull              | <i>Larus delawarensis</i>         | 13.33           | 0.130      |
|                        | Franklin's Gull               | <i>Leucophaeus pipixcan</i>       | 11.96           | 0.159      |
| Tree Swallow           | <i>Tachycineta bicolor</i>    | 15.79                             | 0.179           |            |

| Group Name | Common Name             | Scientific Name                      | Indicator Value | <i>p</i> -value |
|------------|-------------------------|--------------------------------------|-----------------|-----------------|
|            | Alder Flycatcher        | <i>Recurvirostra americana</i>       | 11.93           | 0.209           |
|            | Ruddy Duck              | <i>Oxyura jamaicensis</i>            | 13.33           | 0.230           |
|            | Yellow-headed Blackbird | <i>Xanthocephalus xanthocephalus</i> | 13.47           | 0.257           |
|            | Le Conte's Sparrow      | <i>Ammodramus leconteii</i>          | 7.33            | 0.622           |
|            | Canvasback              | <i>Aythya valisineria</i>            | 4.11            | 0.718           |

**Table 2** Contingency table comparing the observed classification of wetland sites based on their comprehensive wetland-dependent bird assemblage and the predicted assemblage membership for each site. Predictions were based on a classification tree based on a set of local, landscape-level, and regional habitat characteristics (full list in Online Resource 2).

|            |                        | Observed         |                      |                 |            |                        |
|------------|------------------------|------------------|----------------------|-----------------|------------|------------------------|
|            |                        | Shrub Associates | Wetland Edge Nesters | Hummock Nesters | Shorebirds | Pond & Reed Associates |
| Prediction | Shrub Associates       | 7                | 0                    | 2               | 0          | 0                      |
|            | Wetland Edge Nesters   | 0                | 4                    | 1               | 0          | 0                      |
|            | Hummock Nesters        | 3                | 1                    | 11              | 0          | 0                      |
|            | Shorebirds             | 1                | 1                    | 1               | 13         | 3                      |
|            | Pond & Reed Associates | 2                | 0                    | 2               | 0          | 12                     |
|            |                        |                  |                      |                 |            |                        |

**Fig. 1** A map of study our region in the northern prairie pothole region. Our 72 wetland sites occupied both the Grasslands and Parklands region, belonging to temporary ( $n=11$ ), seasonal ( $n=18$ ), semi-permanent ( $n=10$ ), and permanence ( $n=9$ ) permanence classes.

**Fig. 2** Dendrogram from agglomerative hierarchical clustering, where group membership was derived from indicator species analysis for birds categorized as wetland-dependent species only. Birds categorized as terrestrial species were excluded from this analysis (see Online Resource 1). Symbology of the sites at the tips of the dendrogram reflects the optimal dendrogram pruning level, determined using indicator species analysis. Group names were based on the life history traits of the dominant indicator taxa for each group.

**Fig. 3** Plot of the nonmetric multidimensional scaling ordination for wetland-dependent birds, for both axis one and two (A & C) and two and three (B & D). Site assemblages are the result of our paired agglomerative hierarchical clustering and indicator species analyses. We estimated vectors from correlations between both axis and the 1) abundance of wetland birds (A & B), 2) abundance of wetland birds by functional traits (A & B), 3) percentage of non-natural cover and forest and shrub cover in the landscape (C& D) and 4) wetland size and percentage cover of robust emergent vegetation in a given wetland (C & D). Species vectors shown had  $r^2$  values greater than 0.2 for both axes; for functional traits,  $r^2$  values were greater than 0.1. Functional trait vectors indicate a birds' nesting location and primary habitat (black), while wetland characteristics vectors indicate both local and landscape wetland characteristics (blue).

**Fig. 4** Classification and regression tree using a combination of local, landscape-level, and regional variables to predict a bird's assemblage type. Assemblages are derived from cluster analysis carried out on the abundance of wetland birds we observed using the wetlands. Terminal nodes indicate the assemblage predicted to occur at this subset of wetlands by our classification

tree. For each node, we present the 1) predicted assemblage; 2) misclassification error rate; and 3) the number of sites per region (G – Grassland and P – Parkland), permanence class (T – Temporary, S – Seasonal, SP – Semi-Permanent and P – Permanent), disturbance class (L – Low: >25 %, M – Medium: <25<75 % and H – High: <75 % non-natural cover), and observed assemblage (SA: Shrub Associates, WEN: Wetland Edge Nesters, HN: Hummock Nesters, SB: Shorebirds and PRA: Pond & Reed Associates).

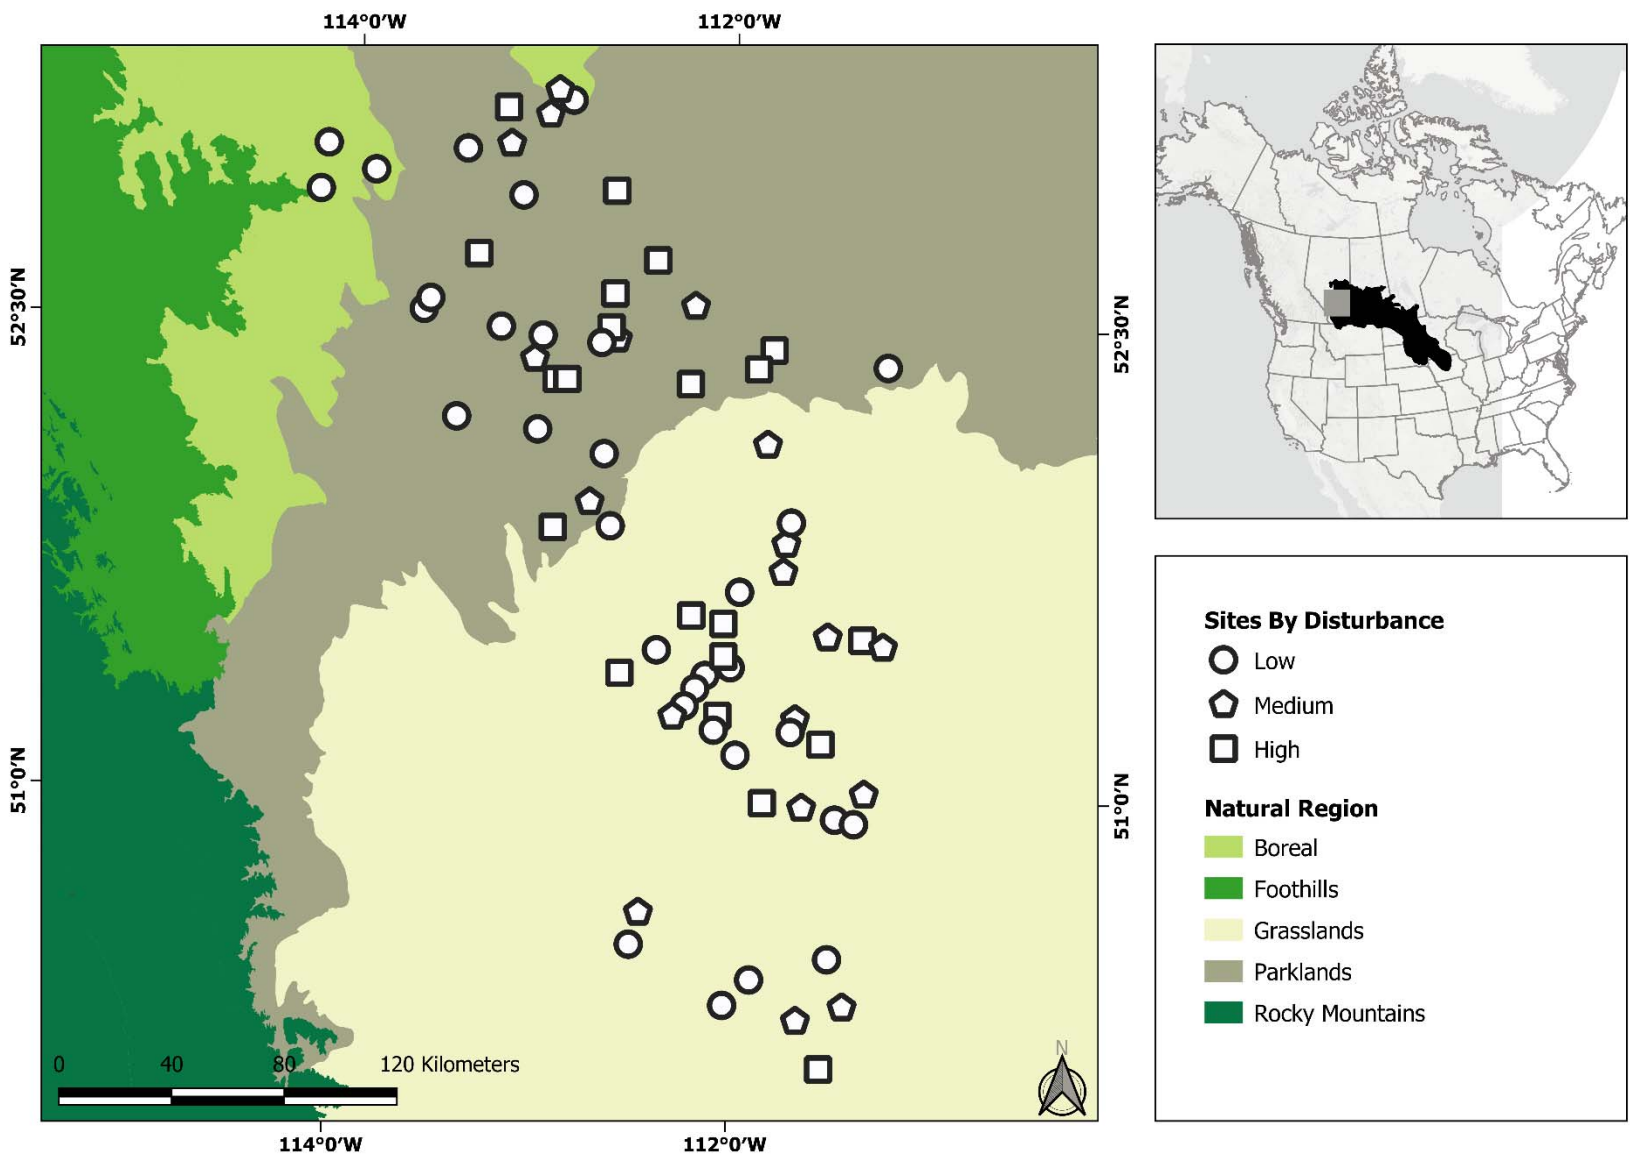

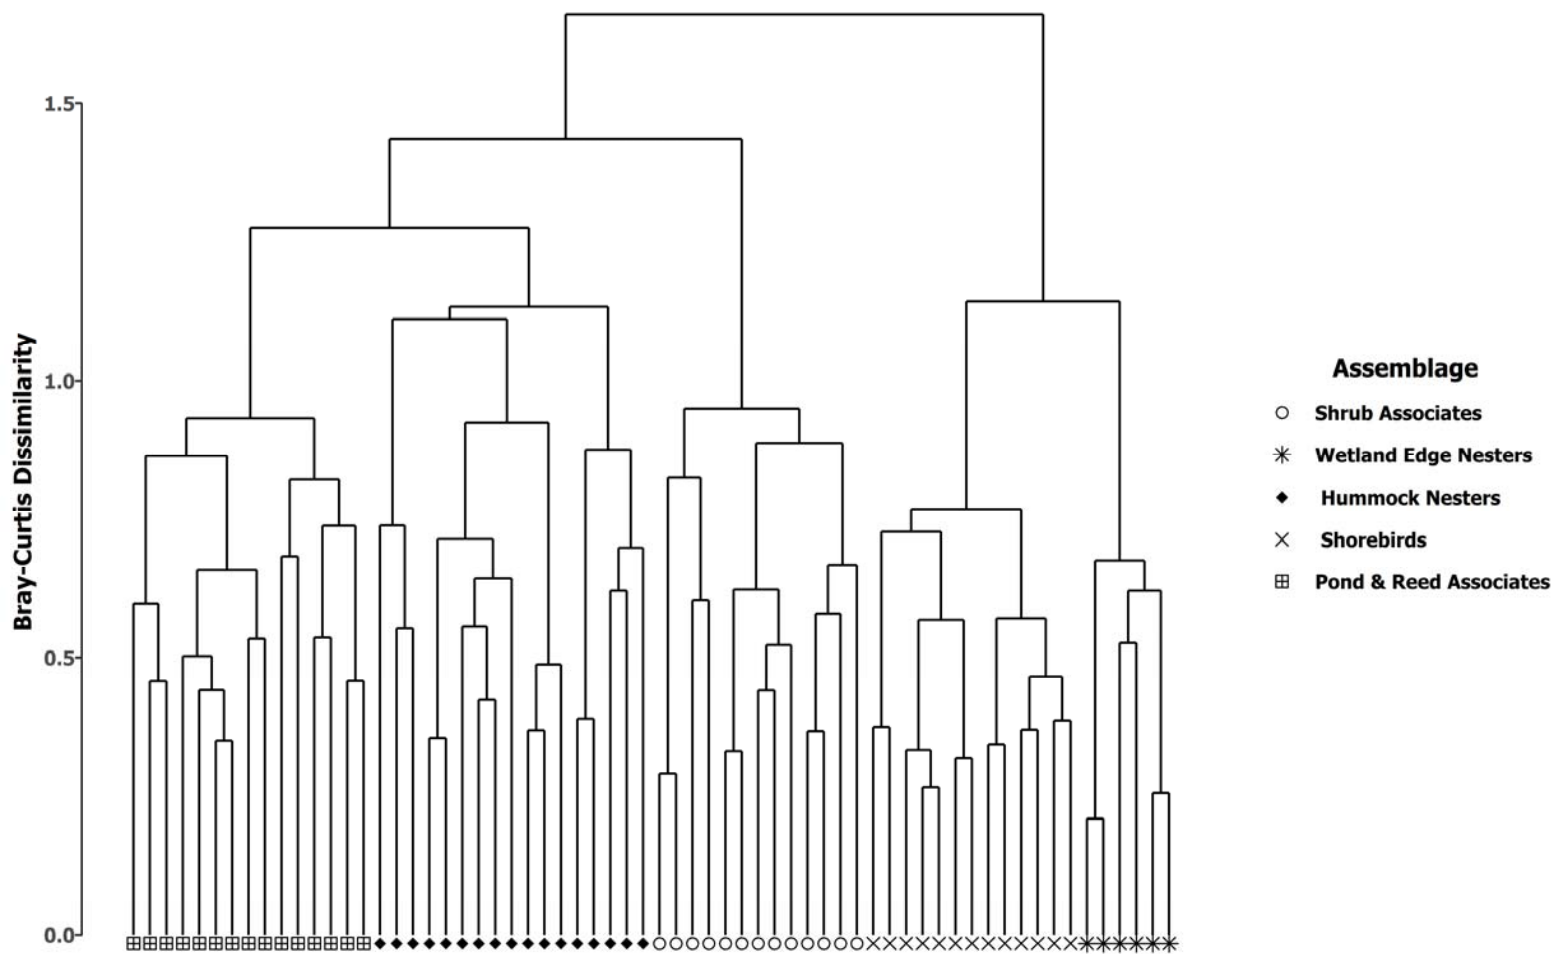

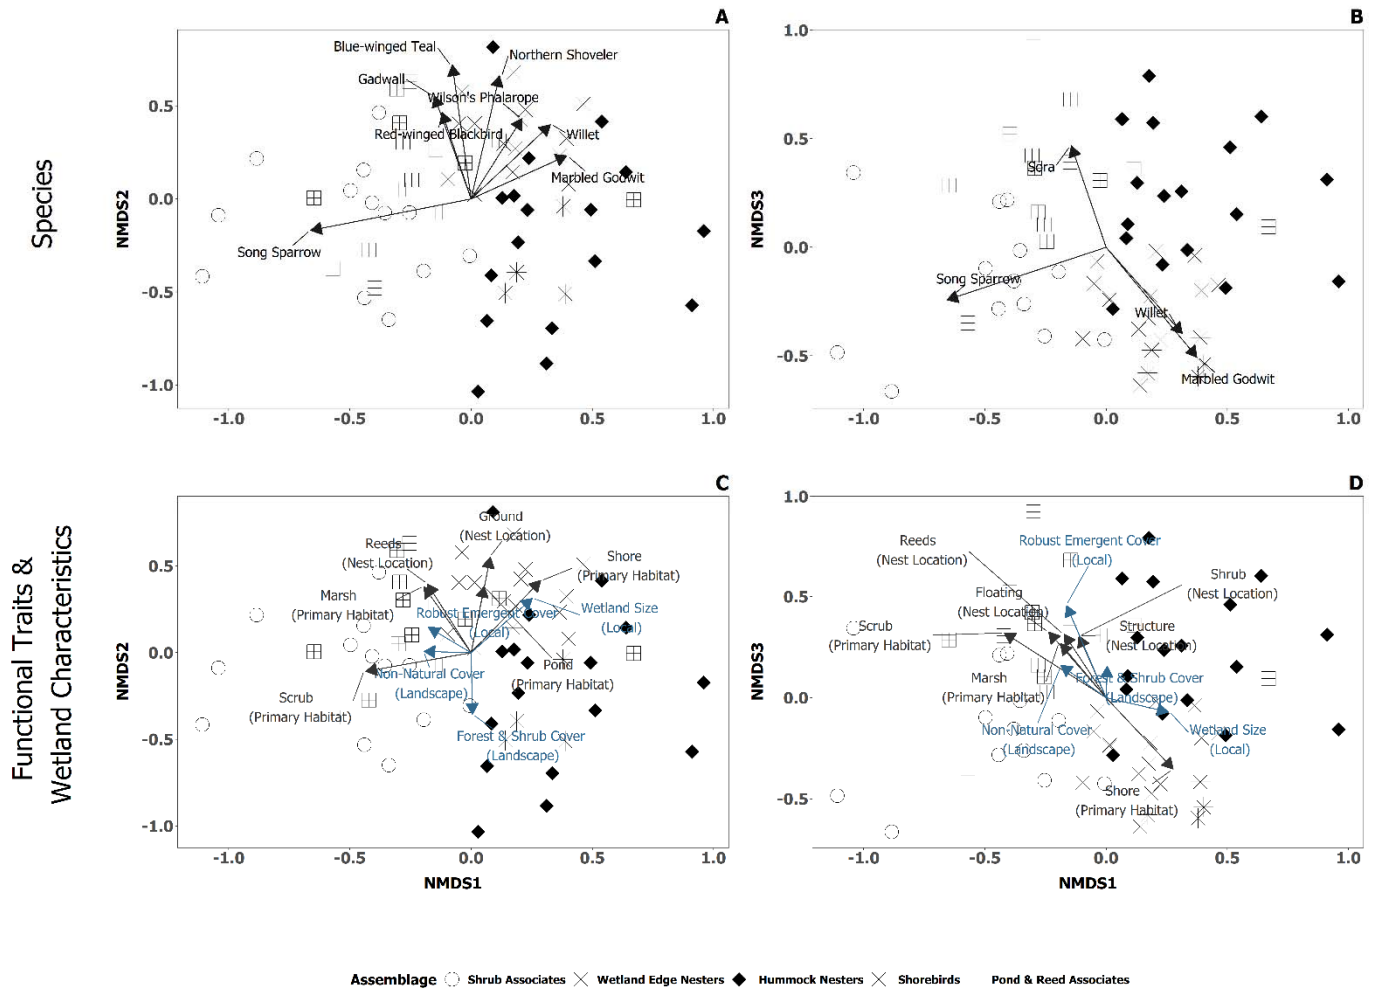



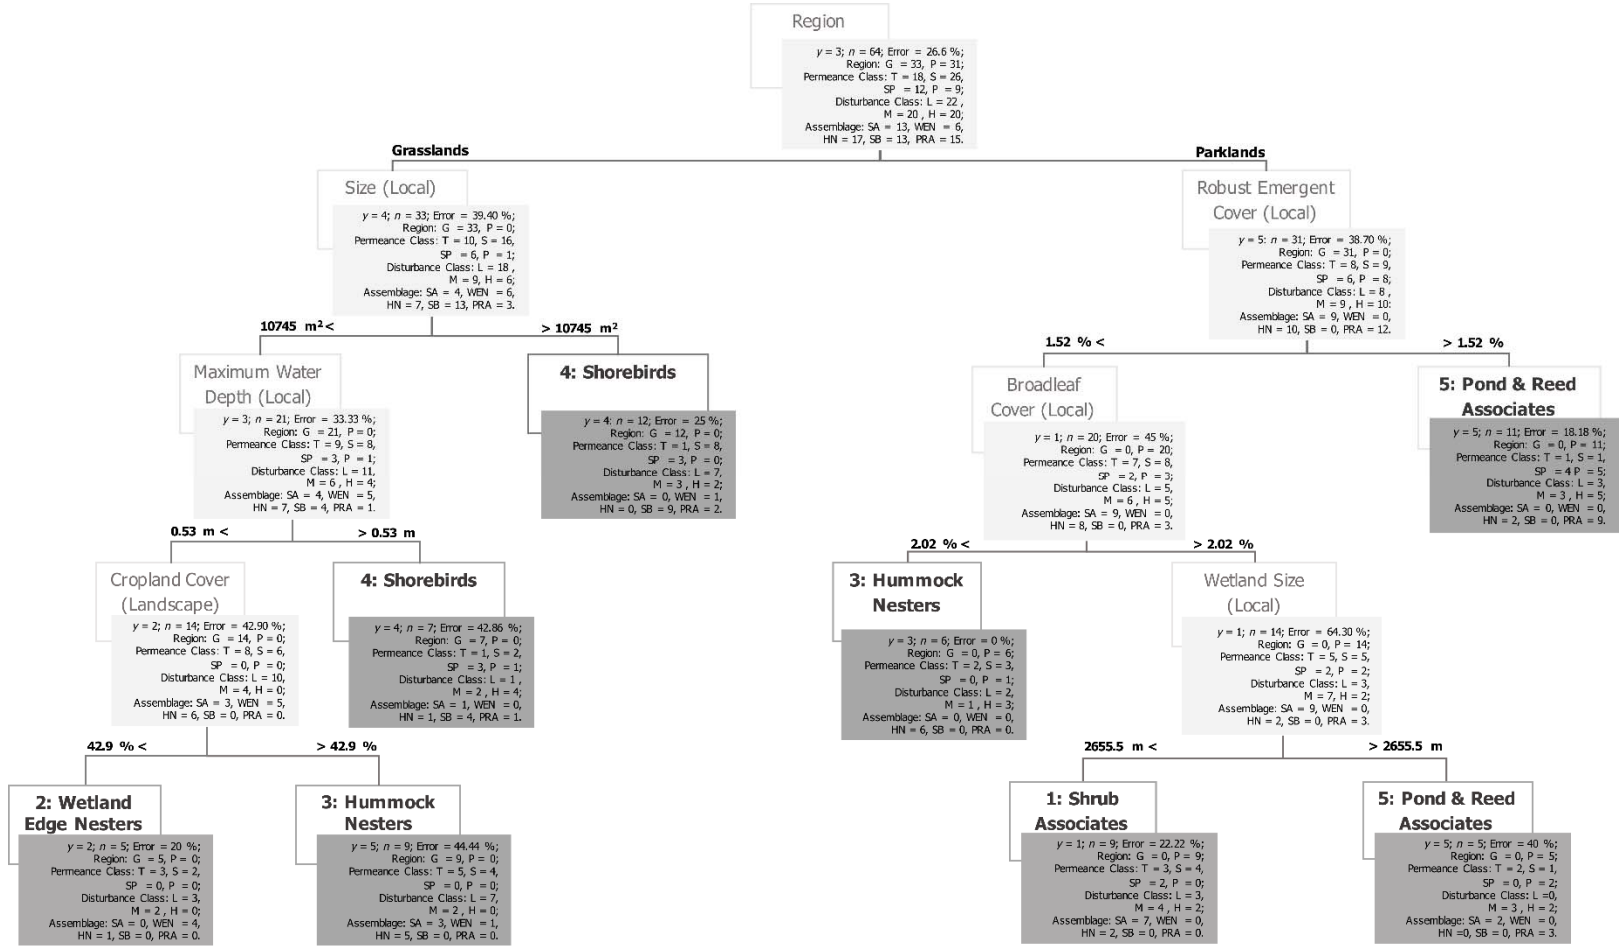



**Online Resource 1** List of species included in our analysis. Species listed as wetland obligate – wet are known to nest in wetlands (i.e., shorebirds and waterfowl), while species listed as wetland obligate – dry (e.g., Bonaparte's Gull, Brewer's Blackbird) may nest in forests or grasslands at the wetland edge.

| Common Name          | Scientific Name                     | Wetland-Dependent Species |                        |
|----------------------|-------------------------------------|---------------------------|------------------------|
|                      |                                     | Wetland Obligate – Wet    | Wetland Obligate – Dry |
| Alder Flycatcher     | <i>Recurvirostra americana</i>      |                           | *                      |
| American Avocet      | <i>Recurvirostra americana</i>      | *                         |                        |
| American Coot        | <i>Fulica americana</i>             | *                         |                        |
| American Wigeon      | <i>Anas americana</i>               | *                         |                        |
| Baltimore Oriole     | <i>Icterus galbula</i>              |                           | *                      |
| Barn Swallow         | <i>Hirundo rustica</i>              |                           | *                      |
| Black-billed Magpie  | <i>Pica hudsonia</i>                |                           | *                      |
| Black Tern           | <i>Chlidonias niger</i>             | *                         |                        |
| Bonaparte's Gull     | <i>Chroicocephalus philadelphia</i> |                           | *                      |
| Brewer's Blackbird   | <i>Euphagus cyanocephalus</i>       |                           | *                      |
| Blue-winged Teal     | <i>Anas discors</i>                 | *                         |                        |
| Canada Goose         | <i>Branta canadensis</i>            | *                         |                        |
| Canvasback           | <i>Aythya valisineria</i>           | *                         |                        |
| Clay-colored Sparrow | <i>Spizella pallida</i>             |                           | *                      |
| Common Yellowthroat  | <i>Geothlypis trichas</i>           |                           | *                      |
| Eastern Kingbird     | <i>Tyrannus tyrannus</i>            |                           | *                      |
| Franklin's Gull      | <i>Leucophaeus pipixcan</i>         | *                         |                        |
| Gadwall              | <i>Anas strepera</i>                | *                         |                        |
| Gray Catbird         | <i>Dumetella carolinensis</i>       |                           | *                      |
| Green-winged Teal    | <i>Anas crecca</i>                  | *                         |                        |
| Horned Grebe         | <i>Podiceps auritus</i>             | *                         |                        |
| Long-billed Curlew   | <i>Numenius americanus</i>          |                           | *                      |
| Le Conte's Sparrow   | <i>Ammodramus leconteii</i>         |                           | *                      |
| Lesser Scaup         | <i>Aythya affinis</i>               | *                         |                        |
| Lesser Yellowlegs    | <i>Tringa flavipes</i>              | *                         |                        |
| Marbled Godwit       | <i>Limosa fedoa</i>                 |                           | *                      |

| Common Name                   | Scientific Name                      | Wetland-Dependent Species |                        |
|-------------------------------|--------------------------------------|---------------------------|------------------------|
|                               |                                      | Wetland Obligate – Wet    | Wetland Obligate – Dry |
| Mallard                       | <i>Anas platyrhynchos</i>            | *                         |                        |
| Nelson's Sparrow              | <i>Ammodramus nelsoni</i>            | *                         |                        |
| Northern Pintail              | <i>Anas acuta</i>                    | *                         |                        |
| Northern Rough-winged Swallow | <i>Stelgidopteryx serripennis</i>    |                           | *                      |
| Northern Shoveler             | <i>Anas clypeata</i>                 | *                         |                        |
| Ring-billed Gull              | <i>Larus delawarensis</i>            | *                         |                        |
| Redhead                       | <i>Aythya americana</i>              | *                         |                        |
| Red-eyed Vireo                | <i>Vireo olivaceus</i>               |                           | *                      |
| Ruddy Duck                    | <i>Oxyura jamaicensis</i>            | *                         |                        |
| Red-winged Blackbird          | <i>Agelaius phoeniceus</i>           |                           | *                      |
| Savannah Sparrow              | <i>Passerculus sandwichensis</i>     |                           | *                      |
| Sora                          | <i>Porzana carolina</i>              | *                         |                        |
| Song Sparrow                  | <i>Melospiza melodia</i>             |                           | *                      |
| Swamp Sparrow                 | <i>Melospiza georgiana</i>           | *                         |                        |
| Tree Swallow                  | <i>Tachycineta bicolor</i>           |                           | *                      |
| Willet                        | <i>Tringa semipalmata</i>            | *                         |                        |
| Wilson's Phalarope            | <i>Phalaropus tricolor</i>           | *                         |                        |
| Wilson's Snipe                | <i>Gallinago delicata</i>            | *                         |                        |
| Yellow-headed Blackbird       | <i>Xanthocephalus xanthocephalus</i> | *                         |                        |

**Online Resource 2** A summary of site, landscape-level and local characteristics of our study wetlands, based on the assemblages' classification from the indicator species analysis for birds categorized as wetland-dependent species. Besides region, we only used local and landscape characteristics in the classification tree. When the variable was continuous, we present the mean value with standard errors. Otherwise, we present the number of sites belonging to the category. Variables with the "\*" symbol are percentage cover estimates, either at the local-level, or within a 500-m buffer landscape surrounding the wetland.

| Assemblage                          | Shrub Associates | Wetland Edge Nesters | Hummock Nesters   | Shorebirds         | Pond & Reed Associates |    |
|-------------------------------------|------------------|----------------------|-------------------|--------------------|------------------------|----|
| <b>Site Characteristics</b>         |                  |                      |                   |                    |                        |    |
| <i>n</i>                            | 13               | 6                    | 17                | 13                 | 15                     |    |
| <b>Permanence Class</b>             | Temporary        | 4                    | 4                 | 6                  | 2                      | 2  |
|                                     | Seasonal         | 6                    | 2                 | 7                  | 8                      | 2  |
|                                     | Semi-Permanent   | 2                    | 0                 | 3                  | 3                      | 4  |
|                                     | Permanent        | 1                    | 0                 | 1                  | 0                      | 7  |
| <b>Region</b>                       | Grassland        | 4                    | 6                 | 7                  | 13                     | 3  |
|                                     | Parkland         | 9                    | 0                 | 10                 | 0                      | 12 |
| <b>Disturbance Class</b>            | Low              | 5                    | 3                 | 7                  | 7                      | 2  |
|                                     | Medium           | 6                    | 2                 | 4                  | 3                      | 5  |
|                                     | High             | 2                    | 1                 | 6                  | 3                      | 8  |
| <b>Local Characteristics</b>        |                  |                      |                   |                    |                        |    |
| <b>Maximum Water Depth (m)</b>      | 0.44 ± 0.06      | 0.26 ± 0.05          | 0.42 ± 0.06       | 0.47 ± 0.05        | 0.62 ± 0.07            |    |
| <b>Wetland Size (m<sup>2</sup>)</b> | 3159.54 ± 961.17 | 4679.83 ± 2098.36    | 6030.29 ± 1907.40 | 14757.77 ± 2693.90 | 9292.07 ± 2340.74      |    |
| <b>*Broadleaf Plants (%)</b>        | 0.95 ± 0.39      | 5.22 ± 5.07          | 7.56 ± 3.15       | 3.28 ± 1.34        | 0.65 ± 0.25            |    |
| <b>*Woody Plants (%)</b>            | 0 ± 0            | 0 ± 0                | 0 ± 0             | 0 ± 0              | 0.04 ± 0.04            |    |
| <b>*Robust Emergent Plants (%)</b>  | 0.62 ± 0.57      | 0.22 ± 0.22          | 1.56 ± 1.00       | 0.79 ± 0.70        | 8.82 ± 2.76            |    |
| <b>Landscape Characteristics</b>    |                  |                      |                   |                    |                        |    |
| <b>*Non-Natural (%)</b>             | 38.64 ± 9.04     | 34.13 ± 15.46        | 41.13 ± 9.42      | 39.4 ± 11.38       | 66.23 ± 7.15           |    |
| <b>*Cropland (%)</b>                | 12.46 ± 5.63     | 53.26 ± 15.35        | 30.47 ± 9.49      | 20.09 ± 7.83       | 42.48 ± 9.31           |    |
| <b>*Urban Exposed Lands (%)</b>     | 1.90 ± 0.55      | 3.91 ± 1.25          | 1.69 ± 0.48       | 4.01 ± 1.79        | 3.22 ± 0.66            |    |
| <b>*Pasture &amp; Forage (%)</b>    | 18.09 ± 5.44     | 3.67 ± 1.82          | 4.64 ± 1.42       | 10.17 ± 4.05       | 19.5 ± 5.57            |    |
| <b>*Water &amp; Wetland (%)</b>     | 5.64 ± 1.73      | 5.32 ± 2.83          | 7.24 ± 1.96       | 5.07 ± 2.18        | 10.87 ± 2.29           |    |
| <b>*Forest &amp; Shrub (%)</b>      | 19.89 ± 8.89     | 15.87 ± 8.93         | 22.34 ± 7.21      | 2.18 ± 1.85        | 6.89 ± 2.47            |    |

**Online Resource 3** Cross-validation error for the classification tree for birds categorized as wetland-dependent species, based on the number of terminal nodes. We found the mean and standard error for cross-validation across 100 iterations.

| <b>Terminal Nodes</b> | <b>Error</b> |
|-----------------------|--------------|
| 10                    | 59.74 ± 0.49 |
| 8                     | 58.66 ± 0.47 |
| 7                     | 60.63 ± 0.51 |
| 3                     | 64.05 ± 0.43 |
| 2                     | 76.25 ± 0.44 |
| 1                     | 82.42 ± 0.30 |
